# Supplementary material
Source: publisher site journal article supplement (https://www.dovepress.com/article/160100)

Supplementary Table 1: Multivariate analysis of prognostic factors for disease-free survival (DFS) in patients

with stage I+II disease

| Variable                     | B       | p            | Exp(B) | 95% CI for exp(B) |
|------------------------------|---------|--------------|--------|-------------------|
| Age                          | -0.117  | 0.556        | 0.889  | 0.602–1.314       |
| Sex                          | -0.104  | 0.723        | 0.901  | 0.508–1.601       |
| Primary tumor location       | 0.208   | 0.356        | 1.232  | 0.791–1.918       |
| T stage                      | 0.433   | 0.065        | 1.543  | 0.973–2.446       |
| Differentiation              | -0.336  | 0.324        | 0.715  | 0.366–1.394       |
| Venous invasion              | 1.371   | <u>0.001</u> | 3.938  | 1.898–8.170       |
| Neural invasion              | 0.299   | 0.436        | 1.348  | 0.636–2.861       |
| MMR status                   | -0.586  | 0.117        | 0.557  | 0.268–1.157       |
| Carcinoma percentage         | -0.044  | 0.159        | 0.957  | 0.900–1.017       |
| Neutrophil-central region    | -0.0167 | 0.582        | 0.846  | 0.467–1.534       |
| Neutrophil- invasive margin  | -0.080  | 0.806        | 0.923  | 0.487–1.749       |
| Lymphocytes-central region   | -0.402  | 0.250        | 0.669  | 0.338–1.327       |
| Lymphocytes- invasive margin | -0.104  | 0.783        | 0.901  | 0.429–1.892       |
| CEA                          | 0.082   | 0.779        | 1.085  | 0.615–1.915       |
| CRP                          | 0.461   | 0.156        | 1.586  | 0.839–2.999       |
| NLR                          | 0.435   | 0.159        | 1.544  | 0.844–2.827       |
| Negative LN                  |         | <u>0.004</u> |        |                   |
| 0–3                          | 1.586   | 0.001        | 4.885  | 1.977–12.069      |
| 4–6                          | 0.450   | 0.327        | 1.569  | 0.637–3.864       |

---

|      |       |       |       |             |
|------|-------|-------|-------|-------------|
| 7–12 | 0.774 | 0.020 | 2.169 | 1.133–4.153 |
|------|-------|-------|-------|-------------|

---

MMR, mismatch repair, CEA, carcinoembryonic antigen; CRP, C reactive protein; NLR, neutrophil to

lymphocyte ratio; LN, lymph node

Supplementary Table 2: Multivariate analysis of prognostic factors for disease-free survival (DFS) in patients with stage III disease

| Variable                     | B      | p            | Exp(B) | 95% CI for exp(B) |
|------------------------------|--------|--------------|--------|-------------------|
| Age                          | 0.147  | 0.421        | 1.158  | 0.810–1.655       |
| Sex                          | -0.047 | 0.864        | 0.954  | 0.557–1.633       |
| Primary tumor location       | 0.317  | 0.297        | 1.373  | 0.757–2.490       |
| T stage                      | -0.045 | 0.860        | 0.956  | 0.581–1.575       |
| Differentiation              | -0.316 | 0.302        | 0.729  | 0.400–1.328       |
| Venous invasion              | 0.074  | 0.786        | 1.077  | 0.630–1.841       |
| Neural invasion              | 0.326  | 0.268        | 1.385  | 0.778–2.465       |
| MMR status                   | -1.075 | 0.125        | 0.341  | 0.087–1.345       |
| Carcinoma percentage         | -0.028 | 0.319        | 0.972  | 0.919–1.028       |
| Neutrophil-central region    | -0.111 | 0.661        | 0.895  | 0.543–1.473       |
| Neutrophil- invasive margin  | 0.127  | 0.616        | 1.135  | 0.691–1.864       |
| Lymphocytes-central region   | -0.351 | 0.308        | 0.704  | 0.358–1.382       |
| Lymphocytes- invasive margin | -0.903 | <u>0.033</u> | 0.405  | 0.177–0.929       |
| CEA                          | 0.154  | 0.575        | 1.166  | 0.682–1.995       |
| CRP                          | -1.075 | 0.077        | 0.360  | 0.116–1.115       |
| NLR                          | 0.347  | 0.274        | 1.415  | 0.760–2.635       |
| Negative LN                  |        | <u>0.015</u> |        |                   |
| 0–3                          | 0.990  | 0.050        | 2.692  | 1.000–7.248       |
| 4–6                          | 1.157  | 0.002        | 3.181  | 1.530–6.612       |

---

|      |       |       |       |             |
|------|-------|-------|-------|-------------|
| 7–12 | 0.505 | 0.138 | 1.657 | 0.850–3.232 |
|------|-------|-------|-------|-------------|

---

MMR, mismatch repair, CEA, carcinoembryonic antigen; CRP, C reactive protein; NLR, neutrophil to

lymphocyte ratio; LN, lymph node

Supplementary Table 3: Multivariate analysis of prognostic factors for overall survival (OS) in patients with stage IV disease

| Variable                     | B      | p            | Exp(B) | 95% CI for exp(B) |
|------------------------------|--------|--------------|--------|-------------------|
| Age                          | 0.445  | <u>0.001</u> | 1.561  | 1.197–2.035       |
| Sex                          | -0.118 | 0.555        | 0.889  | 0.601–1.315       |
| Primary tumor location       | -0.099 | 0.574        | 0.905  | 0.640–1.280       |
| T stage                      | 0.312  | 0.062        | 1.367  | 0.984–1.899       |
| Differentiation              | 0.192  | 0.323        | 1.212  | 0.827–1.776       |
| Venous invasion              | 0.027  | 0.888        | 1.028  | 0.702–1.503       |
| Neural invasion              | 0.631  | <u>0.003</u> | 1.880  | 1.237–2.859       |
| MMR status                   | 0.739  | 0.103        | 2.094  | 0.862–5.084       |
| Carcinoma percentage         | 0.001  | 0.964        | 1.001  | 0.962–1.041       |
| Neutrophil-central region    | 0.027  | 0.887        | 1.027  | 0.709–1.488       |
| Neutrophil- invasive margin  | -0.883 | <u>0.005</u> | 0.414  | 0.222–0.770       |
| Lymphocytes-central region   | -0.072 | 0.764        | 0.931  | 0.583–1.484       |
| Lymphocytes- invasive margin | 0.257  | 0.335        | 1.293  | 0.767–2.178       |
| CEA                          | 0.331  | 0.152        | 1.392  | 0.885–2.191       |
| CRP                          | 0.265  | 0.209        | 1.303  | 0.862–1.971       |
| NLR                          | 0.235  | 0.259        | 1.264  | 0.842–1.900       |
| Negative LN                  |        | <u>0.007</u> |        |                   |
| 0–3                          | 0.853  | 0.002        | 2.348  | 1.369–4.025       |
| 4–6                          | 0.471  | 0.138        | 1.601  | 0.860–2.981       |

---

|      |       |       |       |             |
|------|-------|-------|-------|-------------|
| 7–12 | 0.194 | 0.486 | 1.214 | 0.704–2.094 |
|------|-------|-------|-------|-------------|

---

MMR, mismatch repair, CEA, carcinoembryonic antigen; CRP, C reactive protein; NLR, neutrophil to

lymphocyte ratio; LN, lymph node

Supplementary Table 4: Correlations between the number of negative pericolic nodes and patients'

characteristics

| Variable           | Total | No. of negative pericolic nodes |             |             |            | p*               |
|--------------------|-------|---------------------------------|-------------|-------------|------------|------------------|
|                    |       | 0–3                             | 4–6         | 7–12        | ≥13        |                  |
| Number of patients | 1157  | 472 (40.8%)                     | 346 (29.9%) | 253 (21.9%) | 86 (7.4%)  |                  |
| Age                |       |                                 |             |             |            |                  |
| ≤50 y              | 313   | 122 (39.0%)                     | 85 (27.2%)  | 82 (26.2%)  | 24 (7.7%)  | 0.351            |
| 51–65 y            | 518   | 210 (40.5%)                     | 157 (30.3%) | 111 (21.4%) | 40 (7.7%)  |                  |
| >65 y              | 326   | 140 (42.9%)                     | 104 (31.9%) | 60 (18.4%)  | 22 (6.8%)  |                  |
| Sex                |       |                                 |             |             |            |                  |
| Male               | 713   | 286 (40.1%)                     | 222 (31.1%) | 152 (21.3%) | 53 (7.4%)  | 0.703            |
| Female             | 444   | 186 (41.9%)                     | 124 (27.9%) | 101 (22.7%) | 33 (7.4%)  |                  |
| Primary tumor      |       |                                 |             |             |            |                  |
| Right-side colon   | 435   | 138 (31.7%)                     | 126 (29.0%) | 125 (28.7%) | 46 (10.6%) | <u>&lt;0.001</u> |
| Left-side colon    | 703   | 327 (46.5%)                     | 215 (30.6%) | 122 (17.4%) | 39 (5.5%)  |                  |
| Multiple           | 19    | 7 (36.8%)                       | 5 (26.3%)   | 6 (31.6%)   | 1 (5.3%)   |                  |
| T stage            |       |                                 |             |             |            |                  |
| 1                  | 30    | 19 (63.3%)                      | 10 (33.3%)  | 1 (3.3%)    | 0 (0%)     | <u>&lt;0.001</u> |
| 2                  | 108   | 52 (48.1%)                      | 24 (22.2%)  | 24 (22.2%)  | 8 (7.4%)   |                  |
| 3                  | 788   | 284 (36.0%)                     | 255 (32.4%) | 185 (23.5%) | 64 (8.1%)  |                  |
| 4                  | 231   | 117 (50.6%)                     | 57 (24.7%)  | 43 (18.6%)  | 14 (6.1%)  |                  |
| N stage            |       |                                 |             |             |            |                  |
| 0                  | 698   | 239 (34.2%)                     | 214 (30.7%) | 176 (25.2%) | 69 (9.9%)  | <u>&lt;0.001</u> |
| 1                  | 296   | 129 (43.6%)                     | 97 (32.8%)  | 56 (18.9%)  | 14 (4.7%)  |                  |
| 2                  | 163   | 104 (63.8%)                     | 35 (21.5%)  | 21 (12.9%)  | 3 (1.8%)   |                  |
| Stage              |       |                                 |             |             |            |                  |
| I                  | 106   | 52 (49.1%)                      | 27 (25.5%)  | 21 (19.8%)  | 6 (5.7%)   | <u>&lt;0.001</u> |
| II                 | 505   | 143 (28.3%)                     | 163 (32.3%) | 140 (27.7%) | 59 (11.7%) |                  |
| III                | 263   | 115 (43.7%)                     | 84 (31.9%)  | 51 (19.4%)  | 13 (4.9%)  |                  |
| IV                 | 283   | 162 (57.2%)                     | 72 (25.4%)  | 41 (14.5%)  | 8 (2.8%)   |                  |
| Differentiation    |       |                                 |             |             |            |                  |
| well/moderate      | 875   | 336 (38.4%)                     | 273 (31.2%) | 197 (22.5%) | 69 (7.9%)  | 0.129            |
| poor               | 282   | 136 (48.2%)                     | 73 (25.9%)  | 56 (19.9%)  | 17 (6.0%)  |                  |
| Mucinous histology |       |                                 |             |             |            | 0.666            |

|                  |      |             |             |                    |                  |                  |
|------------------|------|-------------|-------------|--------------------|------------------|------------------|
| Yes              | 65   | 29 (44.6%)  | 15 (23.1%)  | 16 (24.6%)         | 5 (7.7%)         |                  |
| No               | 1088 | 440 (40.4%) | 330 (30.3%) | 237 (21.8%)        | 81 (7.4%)        |                  |
| Neural invasion  |      |             |             |                    |                  |                  |
| absent           | 916  | 348 (38.0%) | 278 (30.3%) | 211 (23.0%)        | 79 (8.6%)        | <u>&lt;0.001</u> |
| present          | 241  | 124 (51.5%) | 68 (28.2%)  | 42 (17.4%)         | 7 (2.9%)         |                  |
| Venous invasion  |      |             |             |                    |                  |                  |
| absent           | 830  | 303 (36.5%) | 250 (30.1%) | 206 (24.8%)        | 71 (8.6%)        | <u>&lt;0.001</u> |
| present          | 327  | 169 (51.7%) | 96 (29.4%)  | 47 (14.4%)         | 15 (4.6%)        |                  |
| CEA <sup>☆</sup> |      |             |             |                    |                  |                  |
| ≤5 ng/ml         | 594  | 229 (38.6%) | 172 (29.0%) | 148 (24.9%)        | 45 (7.6%)        | 0.867            |
| >5 ng/ml         | 562  | 243 (43.2%) | 174 (31.0%) | 105 (18.7%)        | 40 (7.1%)        |                  |
| Tumor size       |      |             |             |                    |                  |                  |
| ≤2 cm            | 96   | 58 (60.4%)  | 28 (29.2%)  | 8 (8.3%)           | 2 (2.1%)         | <u>&lt;0.001</u> |
| 2–5 cm           | 773  | 330 (42.7%) | 237 (30.7%) | 160 (20.7%)        | 46 (6.0%)        |                  |
| >5 cm            | 284  | 80 (28.2%)  | 81 (28.5%)  | 85 (29.9%)         | 38 (13.4%)       |                  |
| MMR status       |      |             |             |                    |                  |                  |
| dMMR             | 112  | 40 (35.7%)  | 26 (23.2%)  | <u>37 (33.0%)</u>  | <u>9 (8.0%)</u>  | <u>0.021</u>     |
| pMMR             | 1045 | 432 (41.3%) | 320 (30.6%) | <u>216 (20.7%)</u> | <u>77 (7.4%)</u> |                  |

☆ 1 patient had missing CEA values.

\* Chi-square test was used to compare patient characteristics, and a p value < 0.05 was considered significant.

MMR, mismatch repair, CEA, carcinoembryonic antigen



Supplementary Table 5: Correlation among pericolic nodes, the local tumor microenvironment, and the systemic inflammatory response

| Tumor microenvironment         | Total | No. of negative pericolic nodes |             |             |            | p*           |
|--------------------------------|-------|---------------------------------|-------------|-------------|------------|--------------|
|                                |       | 0–3                             | 4–6         | 7–12        | ≥23        |              |
| Local tumor microenvironment   |       |                                 |             |             |            |              |
| Carcinoma percentage           |       |                                 |             |             |            |              |
| Low                            | 359   | 162 (45.1%)                     | 107 (29.8%) | 61 (17.0%)  | 29 (8.1%)  | <u>0.038</u> |
| High                           | 797   | 310 (38.9%)                     | 239 (30.0%) | 192 (24.1%) | 56 (7.0%)  |              |
| Neutrophil-central region      |       |                                 |             |             |            |              |
| Low grade                      | 483   | 231 (47.8%)                     | 136 (28.2%) | 90 (18.6%)  | 26 (5.4%)  | <u>0.001</u> |
| High grade                     | 674   | 241 (35.8%)                     | 210 (31.2%) | 163 (24.2%) | 60 (8.9%)  |              |
| Neutrophil- invasive margin    |       |                                 |             |             |            |              |
| Low grade                      | 786   | 366 (46.6%)                     | 229 (29.1%) | 150 (19.1%) | 41 (5.2%)  | <u>0.001</u> |
| High grade                     | 370   | 105 (28.4%)                     | 117 (31.6%) | 103 (27.8%) | 45 (12.2%) |              |
| Lymphocytes-central region     |       |                                 |             |             |            |              |
| Low grade                      | 538   | 239 (44.4%)                     | 168 (31.2%) | 98 (18.2%)  | 33 (6.1%)  | <u>0.007</u> |
| High grade                     | 619   | 233 (37.6%)                     | 178 (28.8%) | 155 (25.0%) | 53 (8.6%)  |              |
| Lymphocytes- invasive margin   |       |                                 |             |             |            |              |
| Low grade                      | 645   | 303 (47.0%)                     | 190 (29.5%) | 121 (18.8%) | 31 (4.8%)  | <u>0.001</u> |
| High grade                     | 512   | 169 (33.0%)                     | 156 (30.5%) | 132 (25.8%) | 55 (10.7%) |              |
| Crohn's-like reaction          |       |                                 |             |             |            |              |
| Yes                            | 95    | 17 (17.9%)                      | 23 (24.2%)  | 38 (40.0%)  | 17 (17.9%) | <u>0.001</u> |
| No                             | 1059  | 453 (42.8%)                     | 322 (30.4%) | 215 (20.3%) | 69 (6.5%)  |              |
| Systemic inflammatory response |       |                                 |             |             |            |              |
| NLR                            |       |                                 |             |             |            |              |
| ≤3                             | 782   | 321 (41.0%)                     | 252 (32.2%) | 163 (20.8%) | 46 (5.9%)  | <u>0.004</u> |
| >3                             | 375   | 151 (40.3%)                     | 94 (25.1%)  | 90 (24.0%)  | 40 (10.7%) |              |
| PLT                            |       |                                 |             |             |            |              |
| normal                         | 835   | 349 (41.8%)                     | 259 (31.0%) | 165 (19.8%) | 62 (7.4%)  | <u>0.045</u> |
| elevated                       | 322   | 123 (38.2%)                     | 87 (27.0%)  | 88 (27.3%)  | 24 (7.5%)  |              |
| CRP                            |       |                                 |             |             |            |              |
| normal                         | 784   | 321 (40.9%)                     | 248 (31.6%) | 166 (21.2%) | 49 (6.3%)  | 0.056        |
| elevated                       | 373   | 151 (40.5%)                     | 98 (26.3%)  | 87 (23.3%)  | 37 (9.9%)  |              |

\* Chi-square test was used to compare patient characteristics, and a p value < 0.05 was considered significant.

CEA, carcinoembryonic antigen; CRP, C reactive protein; NLR, neutrophil to lymphocyte ratio; PLT, platelets

Supplementary Table 6: Correlations between the number of negative intermediate nodes and patients' characteristics

| Variable                  | Total | No. of negative intermediate nodes |                   |                   |                 | p*               |
|---------------------------|-------|------------------------------------|-------------------|-------------------|-----------------|------------------|
|                           |       | 0-3                                | 4-6               | 7-12              | ≥13             |                  |
| Number of patients        | 1157  | 580 (50.1%)                        | 342(29.6%)        | 195(16.9%)        | 40(3.5%)        |                  |
| <b>Age</b>                |       |                                    |                   |                   |                 |                  |
| ≤50 y                     | 313   | 142(45.4%)                         | 91(29.1%)         | 62(19.8%)         | 18(5.8%)        | <u>0.009</u>     |
| 51-65 y                   | 518   | 266(51.4%)                         | 150(29.0%)        | 82(15.8%)         | 20(3.9%)        |                  |
| >65 y                     | 326   | 172(52.8%)                         | 101(31.0%)        | 51(15.6%)         | 2(0.6%)         |                  |
| <b>Sex</b>                |       |                                    |                   |                   |                 |                  |
| Male                      | 713   | 360(50.5%)                         | 210(29.5%)        | 117(16.4%)        | 26(3.6%)        | 0.926            |
| Female                    | 444   | 220(49.5%)                         | 132(29.7%)        | 78(17.6%)         | 14(3.2%)        |                  |
| <b>Primary tumor</b>      |       |                                    |                   |                   |                 |                  |
| Right-side colon          | 435   | 151(34.7%)                         | <u>139(32.0%)</u> | <u>115(26.4%)</u> | <u>30(6.9%)</u> | <u>&lt;0.001</u> |
| Left-side colon           | 703   | 420(59.7%)                         | <u>198(28.2%)</u> | <u>77(11.0%)</u>  | <u>8(1.1%)</u>  |                  |
| Multiple                  | 19    | 9(47.4%)                           | <u>5(26.3%)</u>   | <u>3(15.8%)</u>   | <u>2(10.5%)</u> |                  |
| <b>T stage</b>            |       |                                    |                   |                   |                 |                  |
| 1                         | 30    | 19 (63.3%)                         | 9 (30%)           | 1 (3.3%)          | 1 (3.3%)        | <u>0.030</u>     |
| 2                         | 108   | 59 (54.6%)                         | 27 (25.0%)        | 19 (17.6%)        | 3 (2.8%)        |                  |
| 3                         | 788   | 366 (46.4%)                        | 246 (31.2%)       | 148 (18.8%)       | 28 (3.6%)       |                  |
| 4                         | 231   | 136 (58.9%)                        | 60 (26.0%)        | 27 (11.7%)        | 8 (3.5%)        |                  |
| <b>N stage</b>            |       |                                    |                   |                   |                 |                  |
| 0                         | 698   | 317 (45.4%)                        | 218 (31.2%)       | 136 (19.5%)       | 27 (3.9%)       | <u>&lt;0.001</u> |
| 1                         | 296   | 154 (52.0%)                        | 95 (32.1%)        | 42 (14.2%)        | 5 (1.7%)        |                  |
| 2                         | 163   | 109 (66.9%)                        | 29 (17.8%)        | 17 (10.4%)        | 8 (4.9%)        |                  |
| <b>Stage</b>              |       |                                    |                   |                   |                 |                  |
| I                         | 106   | 59(55.7%)                          | 28(26.4%)         | 16(15.1%)         | 3(2.8%)         | <u>&lt;0.001</u> |
| II                        | 505   | 200(39.6%)                         | 171(33.9%)        | 113(13.7%)        | 21(4.2%)        |                  |
| III                       | 263   | 125(47.5%)                         | 90(34.2%)         | 36(13.7%)         | 12(4.6%)        |                  |
| IV                        | 283   | 196(69.3%)                         | 53(18.7%)         | 30(10.6%)         | 4(1.4%)         |                  |
| <b>Differentiation</b>    |       |                                    |                   |                   |                 |                  |
| well/moderate             | 875   | 427 (48.8%)                        | 268 (30.6%)       | 153(17.5%)        | 27(3.1%)        | 0.094            |
| poor                      | 282   | 153 (54.3%)                        | 74 (26.2%)        | 42(14.9%)         | 13(4.6%)        |                  |
| <b>Mucinous histology</b> |       |                                    |                   |                   |                 |                  |
|                           |       |                                    |                   |                   |                 | 0.795            |

|                 |      |             |             |             |           |                  |
|-----------------|------|-------------|-------------|-------------|-----------|------------------|
| Yes             | 65   | 34(52.3%)   | 16(24.6%)   | 12(18.5%)   | 3(4.6%)   |                  |
| No              | 1088 | 542(49.8%)  | 326(30%)    | 183(16.8%)  | 37(3.4%)  |                  |
| Neural invasion |      |             |             |             |           |                  |
| absent          | 916  | 436 (47.6%) | 283 (30.9%) | 164 (17.9%) | 33 (3.6%) | <u>0.010</u>     |
| present         | 241  | 144 (59.8%) | 59 (24.5%)  | 31 (12.9%)  | 7 (2.9%)  |                  |
| Venous invasion |      |             |             |             |           |                  |
| absent          | 830  | 386 (46.5%) | 262 (31.6%) | 155 (18.7%) | 27 (3.3%) | <u>&lt;0.001</u> |
| present         | 327  | 194 (59.3%) | 80 (24.5%)  | 40 (12.2%)  | 13 (4.0%) |                  |
| CEA*            |      |             |             |             |           |                  |
| ≤5 ng/ml        | 594  | 284(47.8%)  | 177(29.8%)  | 106(17.8%)  | 27(4.5%)  | 0.095            |
| >5 ng/ml        | 562  | 296(52.7%)  | 165(29.4%)  | 88(15.7%)   | 13(2.3%)  |                  |
| Tumor size      |      |             |             |             |           |                  |
| ≤2 cm           | 96   | 74(77.1%)   | 14(14.6%)   | 7(7.3%)     | 1(1.0%)   | <u>&lt;0.001</u> |
| 2–5 cm          | 773  | 399(51.6%)  | 228(29.5%)  | 121(15.7%)  | 25(3.2%)  |                  |
| >5 cm           | 284  | 104(36.6%)  | 99(34.9%)   | 67(23.6%)   | 14(4.9%)  |                  |
| MMR status      |      |             |             |             |           |                  |
| dMMR            | 112  | 39(34.8%)   | 30(26.8%)   | 35(31.3%)   | 8(7.1%)   | <u>&lt;0.001</u> |
| pMMR            | 1045 | 541(51.8%)  | 312(29.9%)  | 160(15.3%)  | 32(3.1%)  |                  |

☆ 1 patient had missing CEA values.

\* Chi-square test was used to compare patient characteristics, and a p value < 0.05 was considered significant.

MMR, mismatch repair, CEA, carcinoembryonic antigen

Supplementary Table 7: Correlation among intermediate nodes, the local tumor microenvironment, and the systemic inflammatory response

| Tumor microenvironment         | Total | No. of negative intermediate node |            |            |          | p*               |
|--------------------------------|-------|-----------------------------------|------------|------------|----------|------------------|
|                                |       | 0-3                               | 4-6        | 7-12       | ≥13      |                  |
| Local tumor microenvironment   |       |                                   |            |            |          |                  |
| Carcinoma percentage           |       |                                   |            |            |          |                  |
| Low                            | 359   | 194(54.0%)                        | 95(26.5%)  | 51(14.2%)  | 19(5.3%) | <u>0.015</u>     |
| High                           | 797   | 386(48.4%)                        | 246(30.9%) | 144(18.1%) | 21(2.6%) |                  |
| Neutrophil-central region      |       |                                   |            |            |          |                  |
| Low grade                      | 483   | 277(57.3%)                        | 125(25.9%) | 66(13.7%)  | 15(3.1%) | <u>0.001</u>     |
| High grade                     | 674   | 303(45.0%)                        | 217(32.2%) | 129(19.1%) | 25(3.7%) |                  |
| Neutrophil- invasive margin    |       |                                   |            |            |          |                  |
| Low grade                      | 786   | 439(55.9%)                        | 208(26.5%) | 113(14.4%) | 26(3.3%) | <u>&lt;0.001</u> |
| High grade                     | 370   | 140(37.8%)                        | 134(36.2%) | 82(22.2%)  | 14(3.8%) |                  |
| Lymphocytes-central region     |       |                                   |            |            |          |                  |
| Low grade                      | 538   | 302(56.1%)                        | 142(26.4%) | 83(15.4%)  | 11(2.1%) | <u>0.001</u>     |
| High grade                     | 619   | 278(44.9%)                        | 200(32.3%) | 112(18.1%) | 29(4.7%) |                  |
| Lymphocytes- invasive margin   |       |                                   |            |            |          |                  |
| Low grade                      | 645   | 354(54.9%)                        | 184(28.5%) | 87(13.5%)  | 20(3.1%) | <u>0.001</u>     |
| High grade                     | 512   | 226(44.1%)                        | 158(30.9%) | 108(21.1%) | 20(3.9%) |                  |
| Crohn's-like reaction          |       |                                   |            |            |          |                  |
| Yes                            | 95    | 28(29.5%)                         | 31(32.6%)  | 31(32.6%)  | 5(5.3%)  | <u>&lt;0.001</u> |
| No                             | 1059  | 549(51.8%)                        | 311(29.4%) | 164(15.5%) | 35(3.3%) |                  |
| Systemic inflammatory response |       |                                   |            |            |          |                  |
| NLR                            |       |                                   |            |            |          |                  |
| ≤3                             | 782   | 401(51.3%)                        | 234(29.9%) | 119(15.2%) | 28(3.6%) | 0.196            |
| >3                             | 375   | 179(47.7%)                        | 108(28.8%) | 76(20.3%)  | 12(3.2%) |                  |
| PLT                            |       |                                   |            |            |          |                  |
| normal                         | 835   | 446(53.4%)                        | 238(28.5%) | 123(14.7%) | 28(3.4%) | <u>0.001</u>     |
| elevated                       | 322   | 134(41.6%)                        | 104(32.3%) | 72(22.4%)  | 12(3.7%) |                  |
| CRP                            |       |                                   |            |            |          |                  |
| normal                         | 784   | 411(52.4%)                        | 228(29.1%) | 118(15.1%) | 27(3.4%) | 0.059            |
| elevated                       | 373   | 169(45.3%)                        | 114(30.6%) | 77(20.6%)  | 13(3.5%) |                  |

\* Chi-square test was used to compare patient characteristics, and a p value < 0.05 was considered significant.

NLR, neutrophil to lymphocyte ratio; CRP, C reactive protein; PLT, platelets

Supplementary Table 8: Correlations between the number of negative nodes at the origin of the inferior mesenteric artery and patients' characteristics

| Variable               | Total | No. of negative nodes at the origin of the inferior mesenteric artery |             |             |           | p*               |
|------------------------|-------|-----------------------------------------------------------------------|-------------|-------------|-----------|------------------|
|                        |       | 0–3                                                                   | 4–6         | 7–12        | ≥13       |                  |
| Number of patients     | 1157  | 639(55.2%)                                                            | 313(27.1%)  | 165(14.3%)  | 40(3.4%)  |                  |
| <b>Age</b>             |       |                                                                       |             |             |           |                  |
| ≤50 y                  | 313   | 157(50.2%)                                                            | 75(24.0%)   | 66(21.1%)   | 15(4.8%)  | <u>0.002</u>     |
| 51–65 y                | 518   | 296(57.1%)                                                            | 143(27.6%)  | 62(12.0%)   | 17(3.3%)  |                  |
| >65 y                  | 326   | 186(57.1%)                                                            | 95(29.1%)   | 37(11.3%)   | 8(2.5%)   |                  |
| <b>Sex</b>             |       |                                                                       |             |             |           |                  |
| Male                   | 713   | 396(55.5%)                                                            | 193(27.1%)  | 99(13.9%)   | 25(3.5%)  | 0.973            |
| Female                 | 444   | 243(54.7%)                                                            | 120(27.0%)  | 66(14.9%)   | 15(3.4%)  |                  |
| <b>Primary tumor</b>   |       |                                                                       |             |             |           |                  |
| Right-side colon       | 435   | 177(40.7%)                                                            | 117(26.9%)  | 107(24.6%)  | 34(7.8%)  | <u>&lt;0.001</u> |
| Left-side colon        | 703   | 451(64.2%)                                                            | 194(27.6%)  | 54(7.7%)    | 4(0.5%)   |                  |
| Multiple               | 19    | 11(37.9%)                                                             | 2(10.5%)    | 4(21.1%)    | 2(10.5%)  |                  |
| <b>T stage</b>         |       |                                                                       |             |             |           |                  |
| 1                      | 30    | 24 (80.0%)                                                            | 4 (13.3%)   | 2 (6.7%)    | 0 (0%)    | <u>0.023</u>     |
| 2                      | 108   | 65 (60.2%)                                                            | 30 (27.8%)  | 10 (9.3%)   | 3 (2.8%)  |                  |
| 3                      | 788   | 408 (51.8%)                                                           | 221 (28.0%) | 128 (16.2%) | 31 (3.9%) |                  |
| 4                      | 231   | 142 (61.5%)                                                           | 58 (25.1%)  | 25 (10.8%)  | 6 (2.6%)  |                  |
| <b>N stage</b>         |       |                                                                       |             |             |           |                  |
| 0                      | 698   | 363 (52.0%)                                                           | 203 (29.1%) | 105 (15.0%) | 27 (3.9%) | 0.085            |
| 1                      | 296   | 170 (57.4%)                                                           | 79 (26.7%)  | 38 (12.8%)  | 9 (3.0%)  |                  |
| 2                      | 163   | 106 (65.0%)                                                           | 31 (19.0%)  | 22 (13.5%)  | 4 (2.5%)  |                  |
| <b>Stage</b>           |       |                                                                       |             |             |           |                  |
| I                      | 106   | 71(67.0%)                                                             | 24(22.6%)   | 8(7.5%)     | 3(2.8%)   | <u>&lt;0.001</u> |
| II                     | 505   | 231(45.7%)                                                            | 160(31.7%)  | 89(17.6%)   | 25(5.0%)  |                  |
| III                    | 263   | 138(52.5%)                                                            | 75(28.5%)   | 40(15.2%)   | 10(3.8%)  |                  |
| IV                     | 283   | 199(70.3%)                                                            | 54(19.1%)   | 28(9.9%)    | 2(0.7%)   |                  |
| <b>Differentiation</b> |       |                                                                       |             |             |           |                  |
| well/moderate          | 875   | 478 (54.6%)                                                           | 241 (27.5%) | 128(14.6%)  | 28(3.2%)  | 0.781            |
| poor                   | 282   | 161 (57.1%)                                                           | 72 (25.5%)  | 37(13.1%)   | 12(4.3%)  |                  |
| Mucinous histology     |       |                                                                       |             |             |           | <u>0.032</u>     |

|                 |      |             |             |             |           |                  |
|-----------------|------|-------------|-------------|-------------|-----------|------------------|
| Yes             | 65   | 36(55.4%)   | 12(18.5%)   | 11(16.9%)   | 6(9.2%)   |                  |
| No              | 1088 | 599(55.1%)  | 301(27.7%)  | 154(14.2%)  | 34(3.1%)  |                  |
| Neural invasion |      |             |             |             |           | 0.077            |
| absent          | 916  | 489 (53.4%) | 261 (28.2%) | 135 (14.6%) | 31 (3.4%) |                  |
| present         | 241  | 150 (62.2%) | 52 (21.6%)  | 30 (12.4%)  | 9 (3.7%)  |                  |
| Venous invasion |      |             |             |             |           | <u>0.025</u>     |
| absent          | 830  | 438 (52.8%) | 244 (29.4%) | 120 (14.5%) | 28 (3.4%) |                  |
| present         | 327  | 201 (61.5%) | 69 (21.1%)  | 45 (13.8%)  | 12 (3.7%) |                  |
| CEA*            |      |             |             |             |           | 0.065            |
| ≤5 ng/ml        | 594  | 318(53.5%)  | 154(25.9%)  | 96(16.2%)   | 26(4.4%)  |                  |
| >5 ng/ml        | 562  | 320(56.9%)  | 159(28.3%)  | 69(12.3%)   | 14(2.5%)  |                  |
| Tumor size      |      |             |             |             |           |                  |
| ≤2 cm           | 96   | 76(79.2%)   | 14(14.6%)   | 4(4.2%)     | 2(2.1%)   | <u>&lt;0.001</u> |
| 2–5 cm          | 773  | 442(57.2%)  | 214(27.7%)  | 97(12.5%)   | 20(2.6%)  |                  |
| >5 cm           | 284  | 118(41.5%)  | 84(29.6%)   | 64(22.5%)   | 18(6.3%)  |                  |
| MMR status      |      |             |             |             |           | <u>&lt;0.001</u> |
| dMMR            | 112  | 40(35.7%)   | 37(33.0%)   | 23(20.5%)   | 12(10.7%) |                  |
| pMMR            | 1045 | 599(57.3%)  | 276(26.4%)  | 142(13.6%)  | 28(2.7%)  |                  |

☆ 1 patient had missing CEA values.

\* Chi-square test was used to compare patient characteristics, and a p value < 0.05 was considered significant.

CEA, carcinoembryonic antigen; MMR, mismatch repair

Supplementary Table 9: Correlation among lymph nodes at the origin of the inferior mesenteric artery, the local tumor microenvironment, and the systemic inflammatory response

| Tumor microenvironment         | Total | No. of negative nodes at the origin of the inferior mesenteric artery |            |            |          | p*               |
|--------------------------------|-------|-----------------------------------------------------------------------|------------|------------|----------|------------------|
|                                |       | 0-3                                                                   | 4-6        | 7-12       | ≥13      |                  |
| Local tumor microenvironment   |       |                                                                       |            |            |          |                  |
| Carcinoma percentage           |       |                                                                       |            |            |          |                  |
| Low                            | 359   | 208(57.9%)                                                            | 87(24.2%)  | 46(12.8%)  | 18(5.1%) | 0.088            |
| High                           | 797   | 431(54.1%)                                                            | 225(28.2%) | 119(14.9%) | 22(2.8%) |                  |
| Neutrophil-central region      |       |                                                                       |            |            |          |                  |
| Low grade                      | 483   | 301(62.3%)                                                            | 116(24.0%) | 55(11.4%)  | 11(2.3%) | <u>&lt;0.001</u> |
| High grade                     | 674   | 338(50.1%)                                                            | 197(29.2%) | 110(16.3%) | 29(4.3%) |                  |
| Neutrophil- invasive margin    |       |                                                                       |            |            |          |                  |
| Low grade                      | 786   | 477(60.7%)                                                            | 187(23.8%) | 99(12.6%)  | 23(2.9%) | <u>&lt;0.001</u> |
| High grade                     | 370   | 161(43.5%)                                                            | 126(34.1%) | 66(17.8%)  | 17(4.6%) |                  |
| Lymphocytes-central region     |       |                                                                       |            |            |          |                  |
| Low grade                      | 538   | 310(57.6%)                                                            | 132(24.5%) | 72(13.4%)  | 24(4.5%) | 0.076            |
| High grade                     | 619   | 329(53.2%)                                                            | 181(29.2%) | 93(15.0%)  | 16(2.6%) |                  |
| Lymphocytes- invasive margin   |       |                                                                       |            |            |          |                  |
| Low grade                      | 645   | 387(60.0%)                                                            | 156(24.2%) | 82(12.7%)  | 20(3.1%) | <u>0.004</u>     |
| High grade                     | 512   | 252(49.2%)                                                            | 157(30.7%) | 83(16.2%)  | 20(3.9%) |                  |
| Crohn's-like reaction          |       |                                                                       |            |            |          |                  |
| Yes                            | 95    | 36(37.9%)                                                             | 33(34.7%)  | 22(23.2%)  | 4(4.2%)  | <u>0.003</u>     |
| No                             | 1059  | 600(56.7%)                                                            | 280(26.4%) | 143(13.5%) | 36(3.4%) |                  |
| Systemic inflammatory response |       |                                                                       |            |            |          |                  |
| NLR                            |       |                                                                       |            |            |          |                  |
| ≤3                             | 782   | 447(57.2%)                                                            | 207(26.5%) | 109(13.9%) | 19(2.4%) | <u>0.024</u>     |
| >3                             | 375   | 192(51.2%)                                                            | 106(28.3%) | 56(14.9%)  | 21(5.5%) |                  |
| PLT                            |       |                                                                       |            |            |          |                  |
| normal                         | 835   | 480(57.5%)                                                            | 233(27.9%) | 99(11.9%)  | 23(2.8%) | <u>&lt;0.001</u> |
| elevated                       | 322   | 159(49.4%)                                                            | 80(24.8%)  | 66(20.5%)  | 17(5.3%) |                  |
| CRP                            |       |                                                                       |            |            |          |                  |
| normal                         | 784   | 448(57.1%)                                                            | 213(27.2%) | 101(12.9%) | 22(2.8%) | <u>0.049</u>     |
| elevated                       | 373   | 191(51.2%)                                                            | 100(26.8%) | 64(17.2%)  | 18(4.8%) |                  |

\* Chi-square test was used to compare patient characteristics, and a pvalue < 0.05 was considered significant.

NLR, neutrophil to lymphocyte ratio; PLT, platelets; CRP, C reactive protein

Supplementary figure: Disease free survival of patients with stage I+II colon cancer grouped by negative pericolic nodes (A), intermediate nodes (B) and nodes at the origin of the inferior mesenteric artery (C). Disease free survival of patients with stage III colon cancer grouped by negative pericolic nodes (D), intermediate nodes (E) and nodes at the origin of the inferior mesenteric artery (F). Overall survival of patients with stage IV colon cancer grouped by negative pericolic nodes (G), intermediate nodes (H) and nodes at the origin of the inferior mesenteric artery (I).

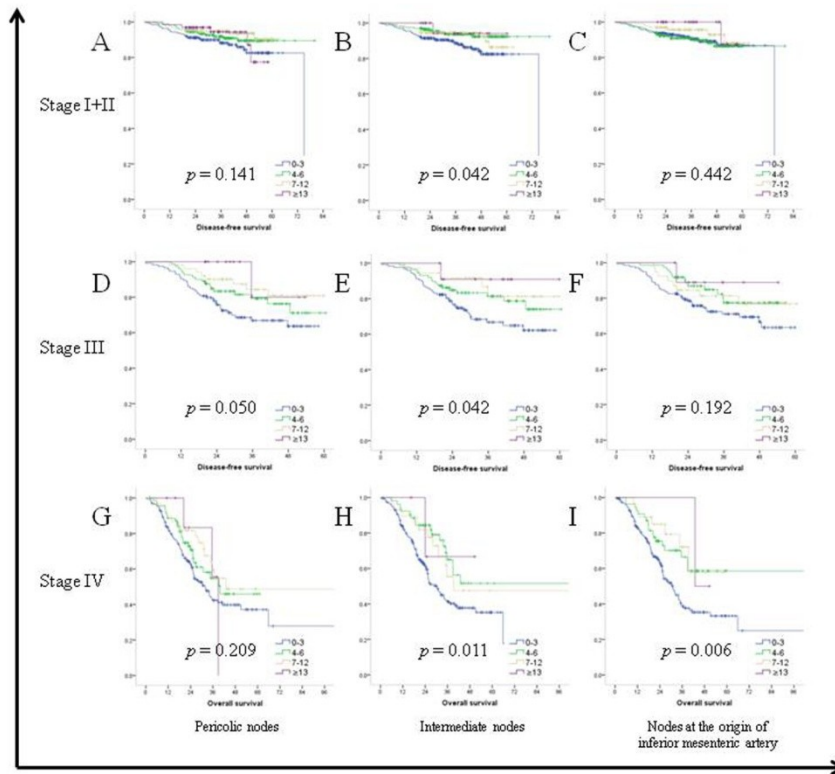

Supplement: Supplementary file 1 [file get_supplementary_file.php]
